# Supplementary material
Source: PubMed Central journal article supplement (PMC8054601)
Supplement: JGMED20006981.pdf [file JGMED20006981.pdf]

Armendariz J, Tamayo C, Slade J, Belitskaya-Lévy I, Gray C, Allaudeen N. Interruptions to attending physician rounds and their effect on resident education. *J Grad Med Educ.* 2021;13(2):266–275.

## Supplementary Data

### Interview Script

|                                                                                                                                                                                                                                |
|--------------------------------------------------------------------------------------------------------------------------------------------------------------------------------------------------------------------------------|
| Question 1: How do interruptions affect attending rounds? Could you provide an example or situation when this happened?                                                                                                        |
| Question 2: How do interruptions during attending rounds affect education? (exclude morning report and noon conference) If so, how?                                                                                            |
| Question 3: How many interruptions would you estimate (on average) occur during attending rounds?<br><i>Then share average, median, and range.</i><br>Thoughts?                                                                |
| Question 4: Who or what do you believe is the greatest source of interruptions? Can you think of any specific situations or examples of these interruptions?<br><i>Then share top 4 sources of interruptions.</i><br>Thoughts? |
| Question 5: What do you think is the best course of action to improve attending rounds based on this data?                                                                                                                     |

Armendariz J, Tamayo C, Slade J, Belitskaya-Lévy I, Gray C, Allaudeen N. Interruptions to attending physician rounds and their effect on resident education. *J Grad Med Educ.* 2021;13(2):266–275.

Observation tool

Date:

Observer:

Team:

Day of call cycle:

Intern 1:

Intern 2:

Resident:

Attending:

Sub-intern:

Census (IICU):

Total length of rounds (minutes): START: \_\_\_\_\_ STOP: \_\_\_\_\_

TOTAL: \_\_\_\_\_

(End=when attending leaves, includes teaching)

|    | Time | Person(s) being interrupted (I1, I2, R/RI, A, Sub-I) | Activity being interrupted | At bedside? (Y/N) | Source of interruption | Topic of interruption | Topic urgency<br>R = routine<br>U = urgent<br>E = emergent | Method of contact | Length of interruption<br>a) <1 min<br>b) 1-5 min<br>c) >5 min |  |
|----|------|------------------------------------------------------|----------------------------|-------------------|------------------------|-----------------------|------------------------------------------------------------|-------------------|----------------------------------------------------------------|--|
| 1  |      |                                                      |                            |                   |                        |                       |                                                            |                   |                                                                |  |
| 2  |      |                                                      |                            |                   |                        |                       |                                                            |                   |                                                                |  |
| 3  |      |                                                      |                            |                   |                        |                       |                                                            |                   |                                                                |  |
| 4  |      |                                                      |                            |                   |                        |                       |                                                            |                   |                                                                |  |
| 5  |      |                                                      |                            |                   |                        |                       |                                                            |                   |                                                                |  |
| 6  |      |                                                      |                            |                   |                        |                       |                                                            |                   |                                                                |  |
| 7  |      |                                                      |                            |                   |                        |                       |                                                            |                   |                                                                |  |
| 8  |      |                                                      |                            |                   |                        |                       |                                                            |                   |                                                                |  |
| 9  |      |                                                      |                            |                   |                        |                       |                                                            |                   |                                                                |  |
|    | Time | Person(s) being interrupted (I1, I2, R/RI, A, MS)    | Activity being interrupted | At bedside? (Y/N) | Source of interruption | Topic of interruption | Topic urgency<br>R = routine<br>U = urgent<br>E = emergent | Method of contact | Length of interruption<br>a) <1 min<br>b) 1-5 min<br>c) >5 min |  |
| 10 |      |                                                      |                            |                   |                        |                       |                                                            |                   |                                                                |  |

Armendariz J, Tamayo C, Slade J, Belitskaya-Lévy I, Gray C, Allaudeen N. Interruptions to attending physician rounds and their effect on resident education. *J Grad Med Educ.* 2021;13(2):266–275.

|    |  |  |  |  |  |  |  |  |  |  |
|----|--|--|--|--|--|--|--|--|--|--|
| 11 |  |  |  |  |  |  |  |  |  |  |
| 12 |  |  |  |  |  |  |  |  |  |  |
| 13 |  |  |  |  |  |  |  |  |  |  |
| 14 |  |  |  |  |  |  |  |  |  |  |
| 15 |  |  |  |  |  |  |  |  |  |  |
| 16 |  |  |  |  |  |  |  |  |  |  |
| 17 |  |  |  |  |  |  |  |  |  |  |
| 18 |  |  |  |  |  |  |  |  |  |  |
| 19 |  |  |  |  |  |  |  |  |  |  |
| 20 |  |  |  |  |  |  |  |  |  |  |
| 21 |  |  |  |  |  |  |  |  |  |  |
| 22 |  |  |  |  |  |  |  |  |  |  |
| 23 |  |  |  |  |  |  |  |  |  |  |

Armendariz J, Tamayo C, Slade J, Belitskaya-Lévy I, Gray C, Allaudeen N. Interruptions to attending physician rounds and their effect on resident education. *J Grad Med Educ.* 2021;13(2):266–275.

## **Definitions**

Interruption= communication initiated by someone NOT rounding with the team. Ex. If nurse or pharmacist is rounding with the team, their communication is NOT considered an interruption. If nurse vocera's or pharmacist skypes, that IS considered an interruption.

Observations of rounds= On M/T/Th/F: Start observations at 10:30 (after morning report). On Wednesdays: There is no morning report. Start after interdisciplinary team meeting (IDT). Do not include time AFTER noon conference in observations or length of rounds.

Person being interrupted:

Definitions: Intern 1 (I1), Intern 2 (I2), Resident (R) or Resident acting also as intern (RI), Sub-intern (Sub-I), Attending (A)

Source of interruption:

Floor nurse (including charge nurse; include unit)

Laboratory

MD consultant (include specialty)

Other ward MD

Physical therapy

Occupational therapy

Speech therapy

Case manager/home skilled services

Social work

Emergency department

Radiology

Nursing supervisor

ED utilization manager

Transfer center

Overhead call (ex. Code, e-team)

Patient or patient family / friend

Personal

unknown

Activity being interrupted:

Presenting/discussing/listening patient

In CPRS entering orders

In CPRS (not entering orders)

On phone

Teaching (separate from patient presentation)

At bedside

Other (include details)

At bedside = on unit or in patient's room, not in team room. Observer should go in room.

Topic: (If >1 topic, choose the primary topic)

Clarification or request for an order (*routine*)

Armendariz J, Tamayo C, Slade J, Belitskaya-Lévy I, Gray C, Allaudeen N. Interruptions to attending physician rounds and their effect on resident education. *J Grad Med Educ.* 2021;13(2):266–275.

Change in patient status, such as new/worsening symptoms, abnormal vital sign, etc. (*routine or urgent*)

Change in patient status- calling e-team or code (*emergent*)- include whether patient on their team

Patient refusing plan of care (*routine*)

Patient/family wants to talk to team (*routine*)

New admission (*routine*)

Abnormal test result (ex. Critical lab, radiology) (*urgent*)

Consultant (*routine or urgent*)

Dispo planning (*routine*)

Personal (*n/a*)

Other (include details)

Topic urgency: (see above)

Routine (R)

Urgent (U)

Emergent (E)

N/A if personal

Method of contact:

Phone/watch- text

Phone- call

Page (include Spoke on phone)

Skype

Face-to-face

Overhead

Vocera

Other (include details)

If e-team or code → vocera + overhead, include as one interruption, not separate

Length of interruption:

<1minute

1-5 minutes

>5 minutes
